# Supplementary material for: Is postgraduate leadership education a match for the wicked problems of health systems leadership? A critical systematic review
Source: Perspect Med Educ. 2019 Jun 3;8(3):133–42. doi: 10.1007/s40037-019-0517-2 (PMC6565666; doi:10.1007/s40037-019-0517-2)
Supplement: Supplementary file 3 — Summary of postgraduate leadership programs’ guiding frameworks, curricular content, instructional approaches, and evaluation designs (N = 31) [file 40037_2019_517_MOESM3_ESM.docx]

| Table 3. *Summary of postgraduate leadership programs’ guiding frameworks, curricular content, instructional approaches, and evaluation designs (N = 31)* |
| --- |

| **Program feature** | **No. (%)** |
| --- | --- |
| **Guiding leadership frameworks and/or theories informing program design**   - ACGME competencies8,56,81,82,30 - Adaptive leadership and collective leadership33 - CanMEDS48 - Emotional intelligence theory/models36,38 - Full range leadership model (transformational leadership, etc.)35 - Local institutional/organizational model40,44 - MLCF47,50,51 - MLCF, Leadership Qualities Framework, and Leadership for London framework23 - MLCF and Shared Leadership32 - MLCF and Royal College of General Practitioners' Framework45 - NHS Leadership Competency Framework46 - RACMA and relational leadership model34 - US military leadership curriculum37 - Integrated model of behaviour prediction and self-determination theory49 - None specified2,41–43,52–55,76 | 5 (16.1)  1 (3.2)  1 (3.2)  2 (6.5)  1 (3.2)  2 (6.5)  3 (9.8)  1 (3.2)  1 (3.2)  1 (3.2)  1 (3.2)  1 (3.2)  1 (3.2)  1 (3.2)  9 (32.5) |
| **Teaching methods**1   - Case studies/scenarios or case-based learning2,8,39,41,43,52,53 - Coaching33,34,46,50,56 - Computer lab instruction39 - Courses (masters level)33,56 - Experiential rotations (practicum/placement) 23,33,37,40,44,46,51,56,76 - Group discussions2,36,43–45,49,52,55,82 - Inter-specialty care41 - Journal club56 - Journaling82 - Leadership masterclass23 - Learning sets (action/group-based)32,34,47 - Lectures/workshops/seminars/sessions (didactic/with interactive components8,23,33–36,38,40–44,46,48,50–54,56,76,81,82 - Leadership masterclasses42 - Mentorship23,40,44,46,56,76,81 | 7 (22.6)  5 (16.1)  1 (3.2)  2 (6.5)  9 (29.0)  9 (29.0)  1 (3.2)  1 (3.2)  1 (3.2)  1 (3.2)  3 (10)  23 (9.7)  1 (3.2)  7 (22.6) |
| - Online learning (discussion/portfolio/)38,44,46,51,56 - Peer-to-peer teaching46 - Personal study32,46,55 - Projects (individual/group/action) 32,41,42,44–47,49,50,54,55,76,81 | 5 (16.1)  1 (3.2)  3 (9.7)  13 (41.9) |
| - Reflection32,34,35,40,45,46 - Role play2,51,53 - Rounds (walk-arounds, work-rounds)46,56 - Shadowing32,42 | 6 (19.4)  3 (9.7)  2 (6.5)  2 (6.5) |
| - Simulation (scenario models)35,53,54 | 3 (9.7) |
| - Site visits42 - Small group learning (exercises/tutorials)2,44,48,52,53,81 - Team building exercises39 | 1 (3.5)  6 (19.4)  1 (3.2) |
|  |  |
| **Content areas2** |  |
| - Adaptive leadership competencies33 - Appreciative inquiry82 - Assertiveness51 - Authentic leadership2,43 - Business management (e.g., specialty specific)51,55 - Career development48 - Chairing meetings51 - Change management (change implementation, service reconfiguration)23,33,38,39,48 - Clinical leadership (clinical team leadership, clinical enterprise management)2,35,41,44,46,76 - Clinical microsystems (service design, improvement)33,42,50 - Co-leadership (interprofessional)82 - Collaboration and cooperation37 - Communication8,35,36,38,43 - Community engagement (sustainability, communication)40 - Conflict management/resolution8,33,36–38,41,43,48,52,53,82 - Consciousness in leadership82 - Credibility82 - Critical thinking40 - Cultural competence38 - Decision making37,81 - Delegation53 - Difficult conversations51 - Economics (healthcare)34,40,52,55 - Emotional intelligence2,36,38,43,81,82 (emotional awareness and reframing)33 | 1 (3.3)  1 (3.2)  1 (3.2)  2 (6.5)  2 (6.5)  1 (3.2)  1 (3.2)  5 (16.1)  6 (19.4)  3 (9.7)  1 (3.2)  1 (3.2)  5 (16.1)  1 (3.2)  11 (35.5)  1 (3.2)  1 (3.2)  1 (3.2)  1 (3.2)  2 (6.5)  1 (3.2)  1 (3.2)  4 (12.9)  7 (22.6) |
| - Epidemiology and statistics34 - Equity (health disparities)40 - Global strategy and program development 76 - Governance and performance32 - Group governance and mergers52 - Feedback (delivery)8,36,41,53 - Financial management and planning (budgeting, costing analysis)33,34,39,40,52,53,76,81 - Health systems leadership/management (operations/structure/ systems thinking/public leadership)32–34,38,51,76 - Hedging risk 53 - High-value care44 - Human factors37,44,46 - Information technology/systems/Informatics39,54,76 - Insurance contracts54 - Interpersonal skills36,39 - Law and ethics (health care)34 | 1 (3.2)  1 (3.2)  1 (3.2)  1 (3.2)  1 (3.2)  4 (12.9)  8 (25.8)  6 (19.4)  1 (3.2)  1 (3.2)  3 (9.7)  3 (9.7)  1 (3.2)  2 (6.5)  1 (3.2) |
| - Leadership (general)2,23,34,36,38–40,43,54,81 - Leadership capacity building50 - Leadership vs management43 - Leadership role transition8 - Leadership styles2,8,42,43 - Leadership theory (broad, 35 situational leadership33, transformational leadership82) - Learning (learning organizations, learning on services) 38,53 - Management (general/others/performance/staffing/personnel issues/workforce development)23,39,42,51,54 - Marketing (market analysis)54 - Medical culture56 - Motivation (motivation theory, engaging others)8,51 - Narrative33 - Negotiation33,48,52,53,81 - Networking81 - Office space design and equipment54 - Organizational culture, behaviour, structure, and models37,38,40,48,81 - Organizational development and leadership32,55 - Personality types33 | 10 (32.3)  1 (3.2)  1 (3.2)  1 (3.2)  4 (12.9)  3 (9.7)  2 (6.5)  5 (16.1)  1 (3.2)  1 (3.2)  2 (6.5)  1 (3.2)  5 (16.1)  1 (3.2)  1 (3.2)  5 (16.1)  2 (6.5)  1 (3.2) |
| - Physician/surgeon health and wellbeing (stress management, mindfulness, meditation)38,42,53 - Policy (health care/public)23,32,40,52,54,55 - Power (positive power and influence, power, politics, and persuasion)23,33 - Practice management ( groups and compensation, private practice)52,53,55 - Preventive medicine56 - Professionalism38,43 - Program evaluation40,48 - Program planning and design37 - Project management40 - Public health (local systems, critical issues)56 - Quality Improvement and/or Patient Safety (QI methods/statistics, service redesign)23,33,37–39,44,46,48–52,54,56,76 - Research enterprise management 76 - Research skills34 (writing for publication56 grant writing40) - Service management (scheduling/triage)51,54 - Social determinants of health40 - Special populations (individual topics)40,41,48 - Strategic planning/management23,33,54 - Supply chain management76 - Teaching skills41,53 - Team performance (team work/team building/team decision-making)8,33,38,43,48,53 - Technical planning37 - Time management38,51,53,82 - Values-based health care38 | 3 (9.7)  6 (19.4)  2 (6.5)  3 (9.7)  1 (3.2)  2 (6.5)  2 (6.5)  1 (3.2)  1 (3.2)  1 (3.2)  15 (48.4)  1 (3.2)  3 (9.7)  2 (6.5)  1 (3.2)  3 (9.7)  3 (9.7)  1 (3.2)  2 (6.5)  6 (19.7)  1 (3.2)  4 (12.9)  1 (3.2) |
| **Assessment and Feedback3**   - Feedback on reflection tools 32 - Feedback from peers32,34,40,46,56 - Feedback from program staff (or experiential site staff) on role/project performance33,34,37,40,46,49,51,56 - Feedback/assessment of simulated activities35,53 - Knowledge test/exam34,35,39,41,43,44,52,54,82 - Leadership/personality/self-discovery inventories34,36,81 - Objective Structured Teaching Encounters36 - Self-assessment8,35,37,56 - None/Not specified6,2,38,76,24,28 | 1 (3.2)  5 (16.1)  8 (25.8)  2 (6.5)  9 (29.0)  3 (9.7)  1 (3.2)  4 (12.9)  9 (29.0) |
| **Evaluation design**   - Quantitative – pre/post survey or knowledge test38,39,52,53,81 - Quantitative – pre/post survey with comparison group54 - Post program survey 40,48,55 - Quantitative – RCT35 - Qualitative 32,43,47 - Mixed methods2,8,37,41,44–46,49,50 - Time series examination with post-program suvey36 - Unclear or not specified but outcomes reported 23,40,42,51,56 - No evaluation conducted 33,34,76,82 | 5 (16.1)  1 (3.2)  3 (9.7)  1 (3.2)  3 (9.7)  9 (29.0)  1 (3.2)  5 (16.1)  4 (12.9) |

1-3 Programs can be categorized under multiple teaching methods, content areas, and assessment methods; total % for these categories exceeds 100
